# Supplementary material for: Reciprocal Dysregulation of MiR-146b and MiR-451 Contributes in Malignant Phenotype of Follicular Thyroid Tumor
Source: MDPI journal article supplement (doi:10.3390/ijms21175950), 2020-08-19
Supplement: s1 [file s1]

**Knyazeva et al., Reciprocal dysregulation of mir-146b and mir-451 contributes in malignant phenotype of follicular thyroid tumor.**

**Supplementary data 2. MiRNA expression profiling of FA, miFTC and wiFTC using pooled samples**

\*MiRNA selected for further analysis are marked

| miRNA                  | normalized to global Ct mean |              |              | Log(2)        |               |               |
|------------------------|------------------------------|--------------|--------------|---------------|---------------|---------------|
|                        | FA                           | miFTC        | wiFTC        | FA            | miFTC         | wiFTC         |
| hsa-let-7a-5p          | 7,765                        | 7,631        | 15,102       | 2,957         | 2,932         | 3,917         |
| hsa-let-7b-3p          | 0,057                        | 0,052        | 0,062        | -4,130        | -4,257        | -4,008        |
| hsa-let-7b-5p          | 1,426                        | 1,915        | 3,600        | 0,512         | 0,938         | 1,848         |
| hsa-let-7d-3p          | 0,332                        | 0,375        | 0,838        | -1,589        | -1,414        | -0,254        |
| hsa-let-7d-5p          | 0,521                        | 0,581        | 0,928        | -0,939        | -0,785        | -0,107        |
| hsa-let-7f-5p          | 2,612                        | 1,808        | 2,056        | 1,385         | 0,854         | 1,040         |
| hsa-let-7g-5p          | 3,176                        | 3,898        | 5,096        | 1,667         | 1,963         | 2,349         |
| hsa-let-7i-5p          | 1,774                        | 2,780        | 2,593        | 0,827         | 1,475         | 1,375         |
| hsa-miR-101-3p         | 1,209                        | 1,310        | 0,550        | 0,273         | 0,390         | -0,862        |
| hsa-miR-106b-5p        | 0,410                        | 0,511        | 0,266        | -1,286        | -0,968        | -1,913        |
| hsa-miR-10b-5p         | 0,071                        | 0,134        | 0,080        | -3,811        | -2,904        | -3,641        |
| <b>hsa-miR-126-5p</b>  | <b>9,934</b>                 | <b>8,516</b> | <b>2,180</b> | <b>3,312</b>  | <b>3,090</b>  | <b>1,124</b>  |
| hsa-miR-125b-5p        | 0,259                        | 0,417        | 0,650        | -1,947        | -1,261        | -0,622        |
| hsa-miR-126-3p         | 0,303                        | 0,459        | 0,510        | -1,723        | -1,123        | -0,971        |
| hsa-miR-128-3p         | 0,089                        | 0,086        | 0,096        | -3,486        | -3,534        | -3,383        |
| hsa-miR-130a-3p        | 0,223                        | 0,304        | 0,303        | -2,162        | -1,719        | -1,722        |
| hsa-miR-130b-3p        | 0,015                        | 0,013        | 0,022        | -6,100        | -6,210        | -5,503        |
| hsa-miR-132-3p         | 0,084                        | 0,002        | 0,057        | -3,569        | -8,818        | -4,138        |
| hsa-miR-133a-3p        | 0,100                        | 2,006        | 0,055        | -3,327        | 1,005         | -4,175        |
| hsa-miR-133b           | 0,105                        | 1,232        | 0,039        | -3,247        | 0,301         | -4,686        |
| hsa-miR-139-5p         | 0,127                        | 0,076        | 0,132        | -2,979        | -3,717        | -2,918        |
| <b>hsa-miR-21-3p</b>   | <b>0,259</b>                 | <b>0,417</b> | <b>0,650</b> | <b>-1,947</b> | <b>-1,261</b> | <b>-0,622</b> |
| <b>hsa-miR-204-5p</b>  | <b>0,303</b>                 | <b>0,459</b> | <b>0,510</b> | <b>-1,723</b> | <b>-1,123</b> | <b>-0,971</b> |
| hsa-miR-140-3p         | 0,193                        | 0,233        | 0,244        | -2,374        | -2,103        | -2,036        |
| hsa-miR-142-3p         | 1,823                        | 3,047        | 0,843        | 0,866         | 1,608         | -0,246        |
| hsa-miR-142-5p         | 0,086                        | 0,204        | 0,064        | -3,543        | -2,292        | -3,957        |
| hsa-miR-143-3p         | 3,726                        | 1,837        | 3,466        | 1,898         | 0,877         | 1,793         |
| hsa-miR-144-3p         | 0,284                        | 0,437        | 0,104        | -1,817        | -1,194        | -3,270        |
| hsa-miR-144-5p         | 0,061                        | 0,039        | 0,017        | -4,031        | -4,685        | -5,908        |
| hsa-miR-145-5p         | 4,034                        | 4,605        | 2,217        | 2,012         | 2,203         | 1,149         |
| <b>hsa-miR-146b-5p</b> | <b>0,746</b>                 | <b>1,478</b> | <b>2,741</b> | <b>-0,423</b> | <b>0,564</b>  | <b>1,455</b>  |
| hsa-miR-148a-3p        | 2,088                        | 0,893        | 1,135        | 1,062         | -0,163        | 0,182         |
| hsa-miR-148b-3p        | 0,807                        | 0,739        | 1,714        | -0,309        | -0,436        | 0,777         |
| hsa-miR-150-5p         | 0,612                        | 0,626        | 0,558        | -0,708        | -0,675        | -0,842        |
| hsa-miR-151a-5p        | 0,762                        | 1,116        | 1,064        | -0,392        | 0,159         | 0,090         |

|                       |              |              |              |               |               |               |
|-----------------------|--------------|--------------|--------------|---------------|---------------|---------------|
| hsa-miR-152-3p        | 0,480        | 0,358        | 0,432        | -1,059        | -1,483        | -1,212        |
| hsa-miR-154-5p        | 0,003        | 0,006        | 0,002        | -8,373        | -7,314        | -8,887        |
| hsa-miR-15b-3p        | 0,023        | 0,025        | 0,028        | -5,450        | -5,315        | -5,145        |
| hsa-miR-15b-5p        | 0,087        | 0,148        | 0,007        | -3,531        | -2,754        | -7,131        |
| hsa-miR-16-2-3p       | 0,009        | 0,024        | 0,016        | -6,794        | -5,352        | -5,952        |
| hsa-miR-16-5p         | 6,224        | 9,004        | 5,397        | 2,638         | 3,171         | 2,432         |
| hsa-miR-17-5p         | 0,005        | 0,005        | 0,002        | -7,755        | -7,573        | -8,968        |
| hsa-miR-186-5p        | 0,021        | 0,030        | 0,024        | -5,588        | -5,052        | -5,356        |
| hsa-miR-18a-5p        | 0,028        | 0,029        | 0,018        | -5,176        | -5,103        | -5,814        |
| hsa-miR-18b-5p        | 0,014        | 0,028        | 0,011        | -6,134        | -5,144        | -6,544        |
| hsa-miR-193a-5p       | 0,017        | 0,019        | 0,053        | -5,921        | -5,689        | -4,238        |
| hsa-miR-195-5p        | 0,244        | 0,293        | 0,155        | -2,037        | -1,773        | -2,693        |
| hsa-miR-197-3p        | 0,087        | 0,132        | 0,195        | -3,527        | -2,917        | -2,361        |
| hsa-miR-199a-3p       | 0,447        | 0,730        | 0,482        | -1,161        | -0,455        | -1,052        |
| hsa-miR-199a-5p       | 0,406        | 0,702        | 0,809        | -1,300        | -0,511        | -0,306        |
| hsa-miR-19a-3p        | 1,033        | 2,093        | 0,504        | 0,047         | 1,066         | -0,990        |
| hsa-miR-19b-3p        | 2,711        | 4,757        | 1,425        | 1,439         | 2,250         | 0,511         |
| hsa-miR-200a-3p       | 0,318        | 0,480        | 0,273        | -1,651        | -1,059        | -1,871        |
| hsa-miR-20a-5p        | 0,471        | 0,832        | 0,338        | -1,087        | -0,265        | -1,563        |
| hsa-miR-2110          | 0,012        | 0,011        | 0,008        | -6,354        | -6,483        | -6,888        |
| hsa-miR-215-5p        | 0,047        | 0,041        | 0,051        | -4,423        | -4,612        | -4,299        |
| hsa-miR-21-5p         | 0,067        | 11,008       | 4,889        | -3,900        | 3,460         | 2,290         |
| hsa-miR-221-3p        | 0,560        | 1,193        | 0,551        | -0,838        | 0,254         | -0,861        |
| <b>hsa-miR-222-3p</b> | <b>0,460</b> | <b>0,545</b> | <b>1,262</b> | <b>-1,121</b> | <b>-0,875</b> | <b>0,335</b>  |
| hsa-miR-22-3p         | 0,721        | 0,579        | 0,755        | -0,471        | -0,789        | -0,406        |
| hsa-miR-22-5p         | 0,088        | 0,104        | 0,061        | -3,499        | -3,261        | -4,046        |
| hsa-miR-23a-3p        | 4,108        | 5,409        | 4,739        | 2,039         | 2,435         | 2,245         |
| hsa-miR-23b-3p        | 4,081        | 5,144        | 4,295        | 2,029         | 2,363         | 2,103         |
| hsa-miR-25-3p         | 0,425        | 0,462        | 0,422        | -1,236        | -1,114        | -1,244        |
| hsa-miR-26b-5p        | 0,580        | 0,485        | 0,510        | -0,787        | -1,044        | -0,972        |
| hsa-miR-27b-3p        | 3,144        | 2,633        | 4,067        | 1,652         | 1,397         | 2,024         |
| hsa-miR-28-5p         | 0,107        | 0,002        | 0,095        | -3,226        | -8,660        | -3,402        |
| hsa-miR-29a-3p        | 3,526        | 4,545        | 4,694        | -0,413        | 1,767         | 2,231         |
| <b>hsa-miR-29b-3p</b> | <b>1,368</b> | <b>3,353</b> | <b>4,634</b> | <b>0,452</b>  | <b>1,746</b>  | <b>2,212</b>  |
| hsa-miR-301a-3p       | 0,313        | 0,460        | 0,484        | -1,675        | -1,121        | -1,047        |
| hsa-miR-30c-5p        | 6,616        | 7,609        | 5,034        | 2,726         | 2,928         | 2,332         |
| <b>hsa-miR-30a-5p</b> | <b>0,712</b> | <b>0,625</b> | <b>0,344</b> | <b>-0,490</b> | <b>-0,678</b> | <b>-1,539</b> |
| hsa-miR-30e-3p        | 0,200        | 0,263        | 0,255        | -2,321        | -1,927        | -1,970        |
| hsa-miR-30e-5p        | 0,911        | 1,323        | 0,625        | -0,134        | 0,404         | -0,677        |
| hsa-miR-320a          | 0,258        | 0,260        | 1,040        | -1,954        | -1,941        | 0,056         |
| hsa-miR-320b          | 0,071        | 0,034        | 0,177        | -3,820        | -4,867        | -2,496        |
| hsa-miR-320c          | 0,030        | 0,032        | 0,132        | -5,062        | -4,973        | -2,918        |
| <b>hsa-miR-34a-5p</b> | <b>0,343</b> | <b>1,074</b> | <b>1,089</b> | <b>-1,544</b> | <b>0,103</b>  | <b>0,123</b>  |
| <b>hsa-miR-375-3p</b> | <b>1,089</b> | <b>1,461</b> | <b>2,332</b> | <b>0,123</b>  | <b>0,547</b>  | <b>1,221</b>  |
| hsa-miR-324-3p        | 0,154        | 0,124        | 0,259        | -2,699        | -3,013        | -1,948        |
| hsa-miR-328-3p        | 0,466        | 0,407        | 0,687        | -1,101        | -1,296        | -0,542        |
| hsa-miR-335-5p        | 0,007        | 0,012        | 0,007        | -7,235        | -6,394        | -7,097        |

|                        |              |              |              |              |              |               |
|------------------------|--------------|--------------|--------------|--------------|--------------|---------------|
| hsa-miR-338-3p         | 0,185        | 0,274        | 0,140        | -2,433       | -1,867       | -2,832        |
| hsa-miR-339-3p         | 0,032        | 0,021        | 0,056        | -4,986       | -5,567       | -4,147        |
| hsa-miR-342-3p         | 0,230        | 0,201        | 0,210        | -2,122       | -2,313       | -2,249        |
| hsa-miR-362-3p         | 0,106        | 0,168        | 0,026        | -3,244       | -2,576       | -5,246        |
| hsa-miR-365a-3p        | 0,253        | 0,326        | 0,229        | -1,984       | -1,615       | -2,129        |
| hsa-miR-374a-5p        | 0,059        | 0,189        | 0,036        | -4,072       | -2,401       | -4,816        |
| hsa-miR-374b-5p        | 0,169        | 0,156        | 0,075        | -2,567       | -2,678       | -3,730        |
| hsa-miR-376a-3p        | 0,004        | 0,010        | 0,003        | -7,996       | -6,586       | -8,603        |
| hsa-miR-423-3p         | 0,593        | 0,678        | 0,881        | -0,755       | -0,560       | -0,183        |
| hsa-miR-423-5p         | 0,137        | 0,198        | 0,422        | -2,870       | -2,338       | -1,244        |
| hsa-miR-424-5p         | 1,072        | 0,222        | 0,908        | 0,101        | -2,174       | -0,139        |
| hsa-miR-425-5p         | 0,126        | 0,134        | 0,113        | -2,983       | -2,899       | -3,145        |
| <b>hsa-miR-451a-5p</b> | <b>3,812</b> | <b>1,439</b> | <b>0,823</b> | <b>1,931</b> | <b>0,525</b> | <b>-0,281</b> |
| hsa-miR-486-5p         | 0,038        | 0,034        | 0,035        | -4,736       | -4,873       | -4,856        |
| hsa-miR-497-5p         | 0,389        | 1,479        | 0,907        | -1,363       | 0,565        | -0,140        |
| hsa-miR-501-3p         | 0,022        | 0,007        | 0,027        | -5,529       | -7,150       | -5,220        |
| hsa-miR-574-3p         | 0,180        | 0,117        | 0,215        | -2,477       | -3,094       | -2,215        |
| hsa-miR-590-5p         | 0,030        | 0,032        | 0,016        | -5,043       | -4,947       | -5,956        |
| hsa-miR-629-5p         | 0,008        | 0,006        | 0,006        | -7,016       | -7,357       | -7,426        |
| hsa-miR-652-3p         | 0,124        | 0,146        | 0,228        | -3,012       | -2,776       | -2,133        |
| hsa-miR-660-5p         | 0,175        | 0,127        | 0,098        | -2,512       | -2,974       | -3,355        |
| hsa-miR-7-1-3p         | 0,019        | 0,013        | 0,013        | -5,737       | -6,242       | -6,221        |
| hsa-miR-7-5p           | 0,130        | 0,155        | 1,084        | -2,940       | -2,693       | 0,117         |
| hsa-miR-766-3p         | 0,005        | 0,007        | 0,018        | -7,538       | -7,073       | -5,758        |
| hsa-miR-874-3p         | 0,144        | 0,329        | 0,439        | -2,798       | -1,605       | -1,189        |
| hsa-miR-877-5p         | 0,007        | 0,002        | 0,023        | -7,235       | -8,671       | -5,440        |
| hsa-miR-93-5p          | 0,374        | 0,439        | 0,567        | -1,420       | -1,187       | -0,819        |
| hsa-miR-99b-5p         | 0,465        | 0,501        | 0,983        | -1,105       | -0,997       | -0,025        |
