# Supplementary material for: Reciprocal Dysregulation of MiR-146b and MiR-451 Contributes in Malignant Phenotype of Follicular Thyroid Tumor
Source: MDPI journal article supplement (doi:10.3390/ijms21175950), 2020-08-19
Supplement: s1 [file s1]

Knyazeva et al., Reciprocal dysregulation of mir-146b and mir-451 contributes in malignant phenotype of follicular thyroid tumor.

**Supplementary data 1. Primers and probes used for RT-qPCR**

|                      |                 |             |                                               |
|----------------------|-----------------|-------------|-----------------------------------------------|
| miR-29b<br>MI0000105 | Synthetic miRNA |             | UAGCACCAUUUGAAAUCAGUGUU                       |
|                      | Spec-TT         | Primer RT   | CAAATGGTCGACGAATACTGCTAGAGTTGC                |
|                      |                 |             | TAGCAGAGCCCTTAAACACT                          |
|                      |                 | PCR-forward | CAAATGGTCGACGAATACTG                          |
|                      |                 | PCR-reverse | GGTAGCACCATTGAAATCAG                          |
|                      |                 | Probe       | AGAGTTGCTAGCAGAGCCCTTAA                       |
|                      | Spec-SL         | Primer RT   | GTCGTGTCTGAGGCTCACTGAGACCTTTCGAC              |
|                      |                 |             | CCTCGACACGACAA(C)AC(T)GAT                     |
|                      |                 | PCR-forward | CAGCACTAGCACCATTGAA                           |
|                      |                 | PCR-reverse | CTGAGGCTCACTGAGACCT                           |
|                      |                 | Probe       | TTCGCACCCTCGACAGACAACACTGAT                   |
|                      | Uni-Elong       | Adaptor     | GGCCGAACTACGACCTGCATAAACGG                    |
|                      |                 | Primer RT   | CCCAGTTATGGCCGTTTATGCAGGT                     |
|                      |                 | PCR-forward | TAGCACCATTGAAATCAGTGTT                        |
|                      |                 | PCR-reverse | CCCAGTTATGGCCGTTTA                            |
| miR-375<br>MI0000783 | Synthetic miRNA |             | UUUGUUCGUUCGGCUCGCGUGA                        |
|                      | Spec-TT         | Primer RT   | CGAACAAATCAAGCTCTCCAGGTACAGTTGGTACCTGACTCCACG |
|                      |                 |             | CTCACGC                                       |
|                      |                 | PCR-forward | CGAACAAATCAAGCTCTCCAG                         |
|                      |                 | PCR-reverse | CGGTTTGTTTCGTCGGCTC                           |
|                      |                 | Probe       | ACAGTTGGTACCTGACTCCACGC                       |
|                      | Spec-SL         | Primer RT   | GTCGTGTCAGAGGCTCACTGAGACCTATTCGC              |
|                      |                 |             | ACCTCGACACGACT(C)ACG(C)GA                     |

|                         |                 |             |                                                              |
|-------------------------|-----------------|-------------|--------------------------------------------------------------|
|                         |                 | PCR-forward | ACAGCTTTGTTCGTTCCGGC                                         |
|                         |                 | PCR-reverse | CTGAGGCTCACTGAGACCT                                          |
|                         |                 | Probe       | CGACACGACTCACGCGA                                            |
|                         | Uni-Elong       | Adaptor     | GGCCGAACTACGACCTGCATAAACGG                                   |
|                         |                 | Primer RT   | CCCAGTTATGGCCGTTTATGCAGGT                                    |
|                         |                 | PCR-forward | TTGTTCGTTCCGGCTCGC                                           |
|                         |                 | PCR-reverse | CCCAGTTATGGCCGTTTA                                           |
| mir451a-5p<br>MI0001729 | Synthetic miRNA |             | AAACCGUUACCAUUACUGAGUU                                       |
|                         | Spec-TT         | Primer RT   | AACGGTTTCGACGAATACTGCTAGAGTTGCTAGCAGAGCCCTTA<br>AAACTCA      |
|                         |                 |             |                                                              |
|                         |                 | PCR-forward | CAACGGTTTCGACGAATAC                                          |
|                         |                 | PCR-reverse | GGAAACCGTTACCATTACTG                                         |
|                         |                 | Probe       | AGAGTTGCTAGCAGAGCCCTTAA                                      |
|                         | Spec-SL         | Primer RT   | GTCGTGCTGAGGCTCACTGAGACCTATTCGCA<br>CCTCGACACGACAA(C)T(C)AGT |
|                         |                 |             |                                                              |
|                         |                 | PCR-forward | CCAGCAAACCGTTACCATT                                          |
|                         |                 | PCR-reverse | CTGAGGCTCACTGAGACCT                                          |
|                         |                 | Probe       | CGCACCTCGACACGACAACTCAGTA                                    |
|                         | Uni-Elong       | Adaptor     | GGCCGAACTACGACCTGCATAAACGG                                   |
|                         |                 | Primer RT   | CCCAGTTATGGCCGTTTATGCAGGT                                    |
|                         |                 | PCR-forward | AAACCGTTACCATTACTGAGTT                                       |
|                         |                 | PCR-reverse | CCCAGTTATGGCCGTTTA                                           |
| miR-21-5p<br>MI0000077  | Synthetic miRNA |             | UAGCUUAUCAGACUGAUGUUGA                                       |
|                         | Spec-TT         | Primer RT   | ATAAGCTACAACGACCAGAGCTAGAGAACCTAGCTCACCCACTA<br>CTCAACA      |
|                         |                 |             | CATAAGCTACAACGACCAGAG                                        |

|                          |                 |             |                                                          |
|--------------------------|-----------------|-------------|----------------------------------------------------------|
|                          |                 | PCR-reverse | GGTAGCTTATCAGACTGATGT                                    |
|                          |                 | Probe       | AGAGAACCTAGCTCACCCACTAC                                  |
| miR-146b-5p<br>MI0003129 | Synthetic miRNA |             | UGAGAACUGAAUUGCAUAGGCUG                                  |
|                          | Spec-<br>TT     | Primer RT   | CAGTTCTCCTATGCTCTCCAGGTACAGTTGGTACCTGTCTCCAC<br>TTCAGCCT |
|                          |                 | PCR-forward | AGTTCTCCTATGCTCTCCA                                      |
|                          |                 | PCR-reverse | GAGAACTGAATTCCATAGGCT                                    |
|                          |                 | Probe       | TACAGTTGGTACCTGTCTCCACTT                                 |
| miR-20a-5p<br>MI0000076  | Synthetic miRNA |             | UAAAGUGCUUUAUAGUGCAGGUAG                                 |
|                          | Spec-<br>TT     | Primer RT   | GCACTTTACGACGAATACTGCTAGAGTTGCTAGCAGAGCCCTT<br>AACTACCT  |
|                          |                 | PCR-forward | GCGCACTTTACGACGAATAC                                     |
|                          |                 | PCR-reverse | CGTAAAGTGCTTATAGAGCAGGT                                  |
|                          |                 | Probe       | AGAGTTGCTAGCAGAGCCCTTAA                                  |
| miR-204-5p<br>MI0000284  | Synthetic miRNA |             | UUCCCUUUGUCAUCCUAUGCCU                                   |
|                          | Spec-<br>TT     | Primer RT   | GACAAAGGGATATGTGAGACGTACGTTGAGTACGTCAAGTGA<br>AGTAGGCAT  |
|                          |                 | PCR-forward | GACAAAGGGATATGTGAGAC                                     |
|                          |                 | PCR-reverse | CCCTTGTCATCCATGCCT                                       |
|                          |                 | Probe       | ACGTACGTTGAGTACGTCAAGTG                                  |
|                          |                 |             |                                                          |
