# Supplementary material for: Reciprocal Dysregulation of MiR-146b and MiR-451 Contributes in Malignant Phenotype of Follicular Thyroid Tumor
Source: MDPI journal article supplement (doi:10.3390/ijms21175950), 2020-08-19
Supplement: s1 [file s1]

Knyazeva et al., Reciprocal dysregulation of mir-146b and mir-451 contributes in malignant phenotype of follicular thyroid tumor.

**Supplementary data 3. AUC value possible pairs of RNA**

|    | miRNA pairs                     | AUC   |
|----|---------------------------------|-------|
| 1  | hsa-miR-146-5p/hsa-miR-451a     | 0.915 |
| 2  | hsa-miR-375-3p/hsa-miR-451a     | 0.862 |
| 3  | hsa-miR-21-5p/hsa-miR-451a      | 0.860 |
| 4  | hsa-miR-30-5p/hsa-miR-451a      | 0.820 |
| 5  | hsa-miR-29b-3p/hsa-miR-451a     | 0.817 |
| 6  | hsa-miR-146b-5p/hsa-miR-30-5p   | 0.809 |
| 7  | hsa-miR-375-3p/hsa-miR-30-5p    | 0.767 |
| 8  | hsa-miR-375-3p/hsa-miR-29b-3p   | 0.735 |
| 9  | hsa-miR-146b-5p/hsa-miR-29b-3p  | 0.730 |
| 10 | hsa-miR-146b-5p/hsa-miR-204-5p  | 0.695 |
| 11 | hsa-miR-375-3p /hsa-miR-204-5p  | 0.680 |
| 12 | hsa-miR-21-5p /hsa-miR-204-5p   | 0.675 |
| 13 | hsa-miR-204-5p/hsa-miR-451a     | 0.663 |
| 14 | hsa-miR-375-3p /hsa-miR-21-5p   | 0.631 |
| 15 | hsa-miR-21-5p /hsa-miR-29b-3p   | 0.625 |
| 16 | hsa-miR-146b-5p/hsa-miR-21-5p   | 0.604 |
| 17 | hsa-miR-29b-3p/hsa-miR-204-5p   | 0.601 |
| 18 | hsa-miR-146b-5p/hsa-miR-375-3p  | 0.581 |
| 19 | hsa-miR-21-5p /hsa-miR-30-5p    | 0.572 |
| 20 | hsa-miR-375-3p /hsa-miR-146b-5p | 0.556 |
| 21 | hsa-miR-30-5p/hsa-miR-204-5p    | 0.544 |
| 22 | hsa-miR-29b-3p/hsa-miR-30-5p    | 0.519 |
| 23 | hsa-miR-21-5p /hsa-miR-375-3p   | 0.505 |
